# Supplementary material for: Construction of Bio-Based Polyurethanes via Olefin Metathesis and Their Thermal Reversible Behavior
Source: MDPI journal article supplement (doi:10.3390/polym14173597), 2022-08-31
Supplement: s1 [file s1]

Supplementary Materials

# Construction of Bio-based Polyurethane via Olefin Metathesis and Their Thermal Reversible Behavior

Zizhao Liu, Gaosheng Gu, Junwu Chen, Zhongyu Duan\*, and Binyuan Liu\*

<sup>1</sup> Hebei Key Laboratory of Functional Polymer, School of Chemical Engineering and Technology, Hebei University of Technology, Tianjin, China

\* Correspondence: zyduan@hebut.edu.cn; byliu@hebut.edu.cn

**Citation:** Liu, Z.; Gu, G.; Chen, J.; Duan, Z.; Liu, B. Construction of Bio-Based Polyurethanes via Olefin Metathesis and Their Thermal Reversible Behavior. *Polymers* **2022**, *14*, 3597. <https://doi.org/10.3390/polym14173597>

Academic Editor: Alexey Iordanskii

Received: 21 July 2022

Accepted: 26 August 2022

Published: 31 August 2022

**Publisher's Note:** MDPI stays neutral with regard to jurisdictional claims in published maps and institutional affiliations.

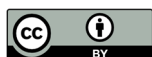

**Copyright:** © 2022 by the authors. Submitted for possible open access publication under the terms and conditions of the Creative Commons Attribution (CC BY) license (<https://creativecommons.org/licenses/by/4.0/>).

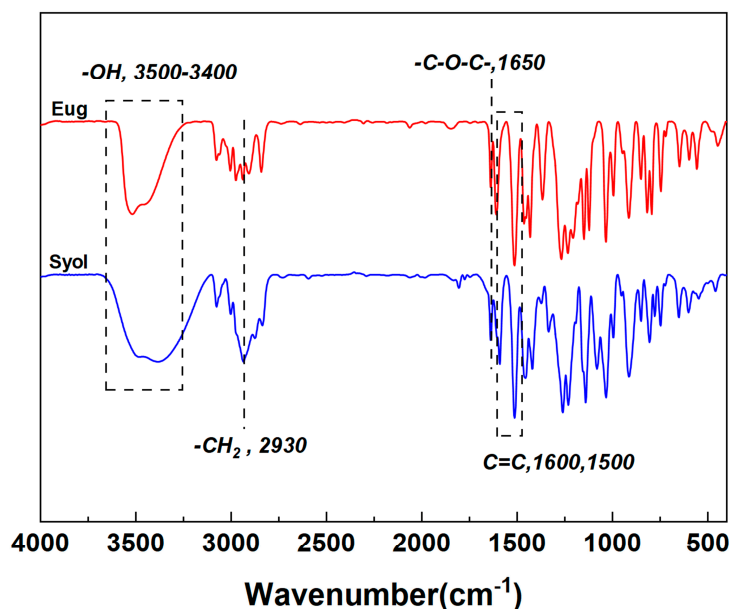

Figure S1. IR spectra of Eug and Syol.

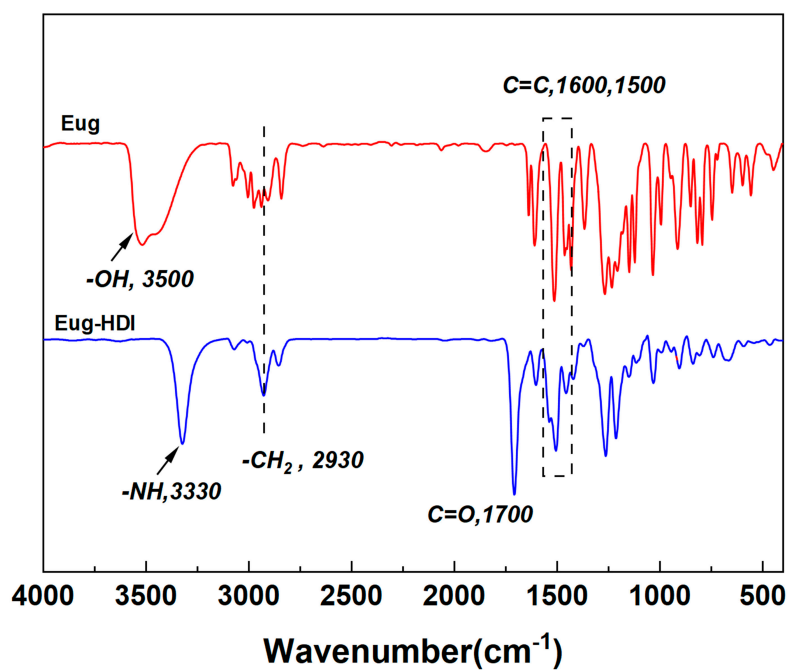

Figure S2. IR spectra of Eug and Eug-HDI.

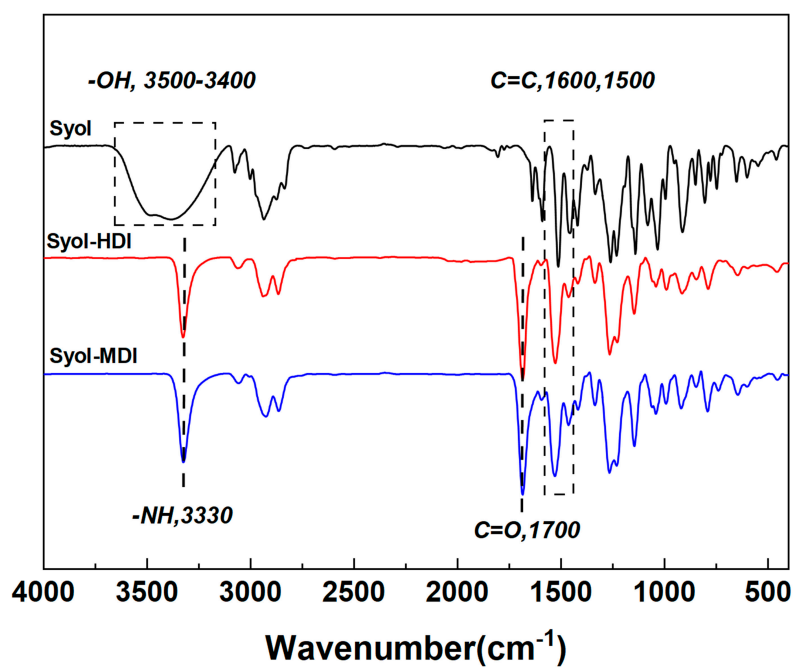

Figure S3. IR spectra of Syol, Syol-HDI and Syol-MDI.

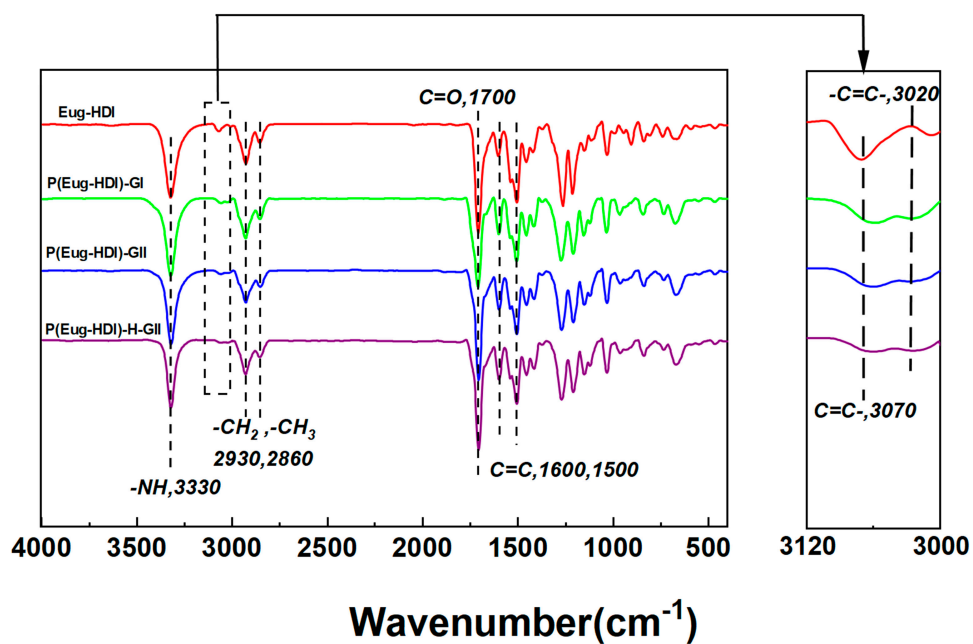

Figure S4. IR spectra of Eug-HDI and P(Eug-HDI) under different catalysts.

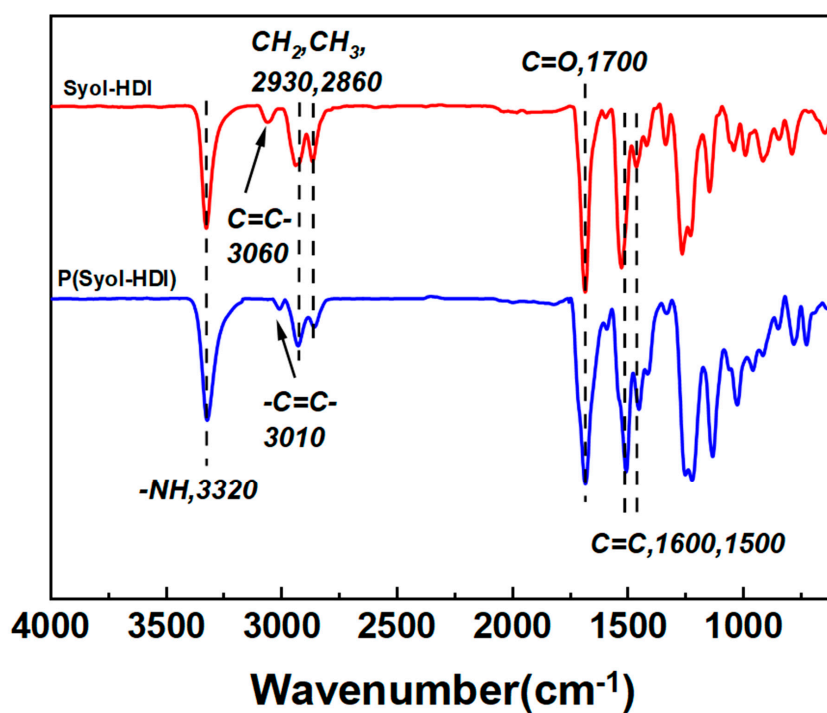

Figure S5. IR spectra of Syol-HDI and P(Syol -HDI).

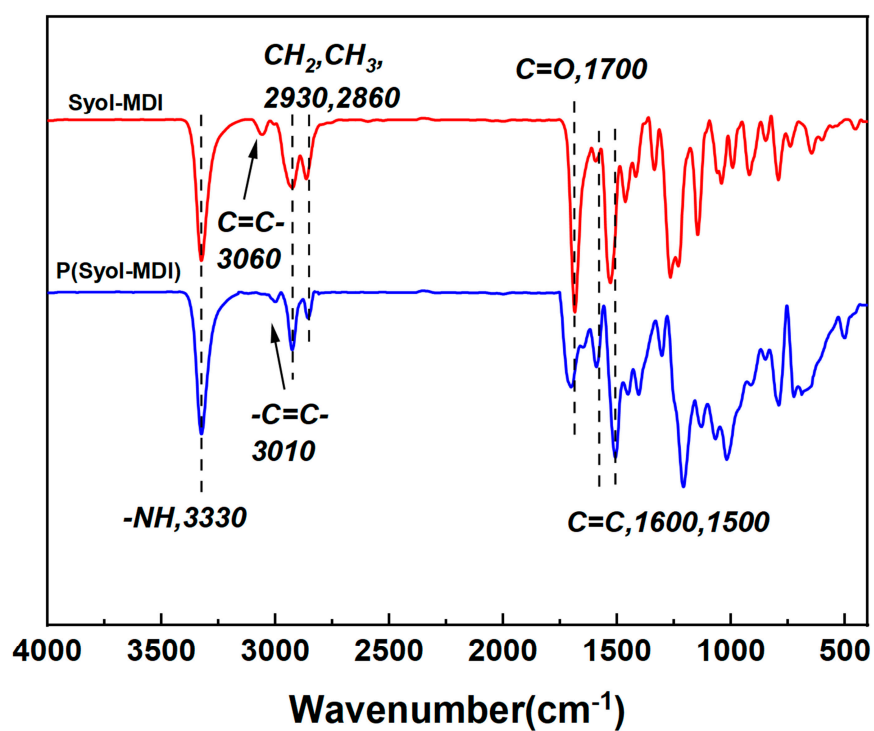

Figure S6. IR spectra of Syol-MDI and P(Syol - MDI).

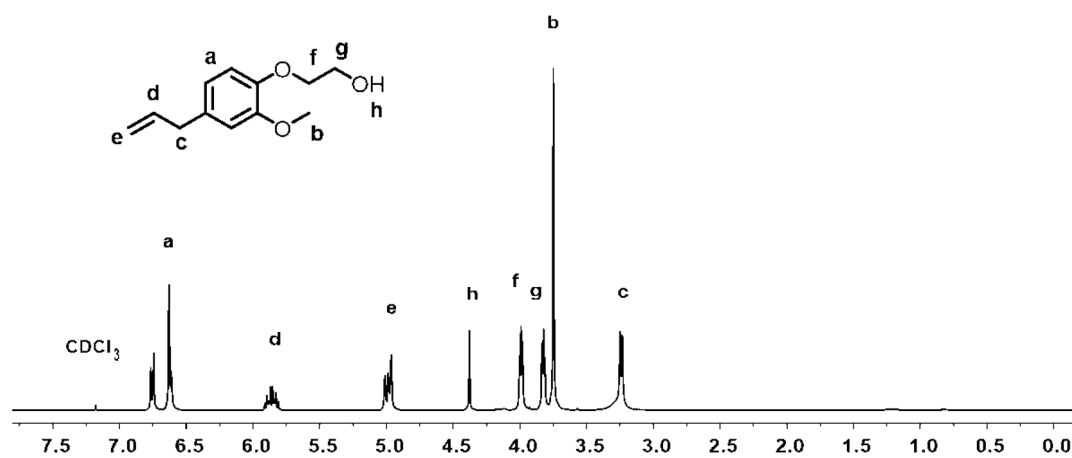

Figure S7. The <sup>1</sup>H NMR spectrum of Syol.

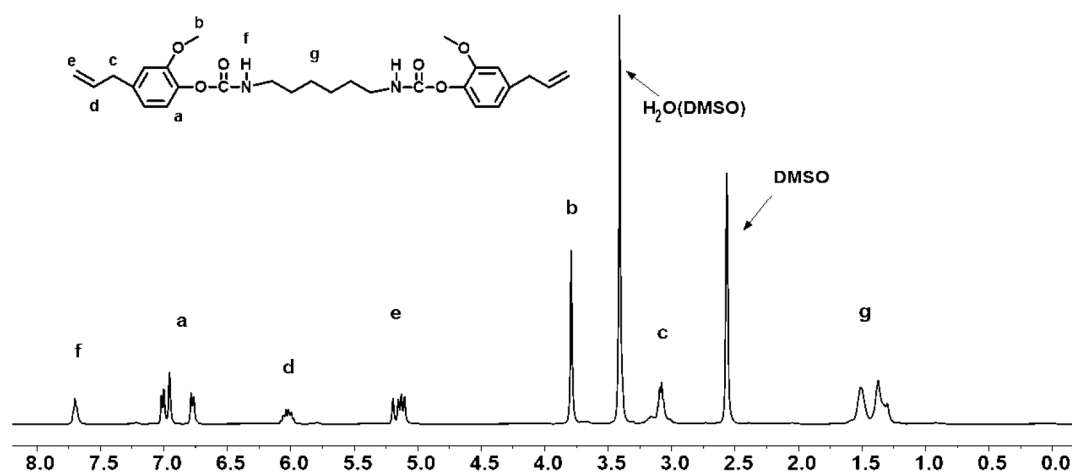Figure S8. The <sup>1</sup>H NMR spectrum of Eug-HDI.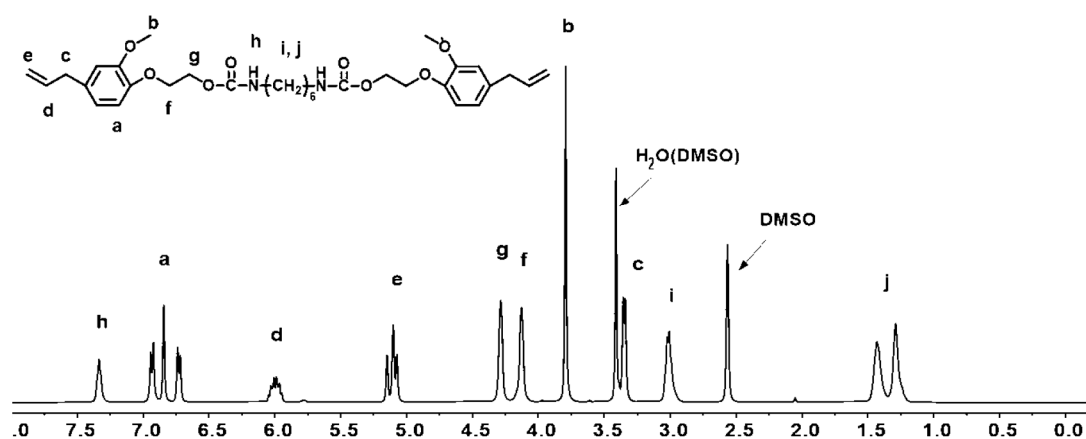Figure S9. The <sup>1</sup>H NMR spectrum of Syol-HDI.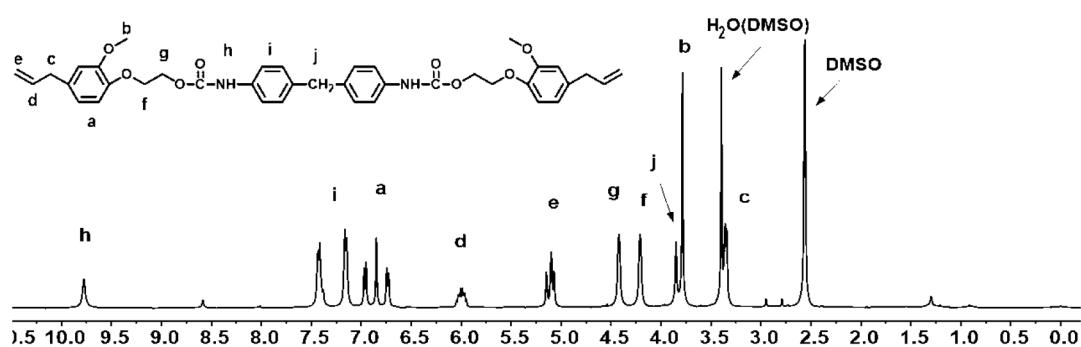Figure S10. The <sup>1</sup>H NMR spectrum of Syol-MDI.

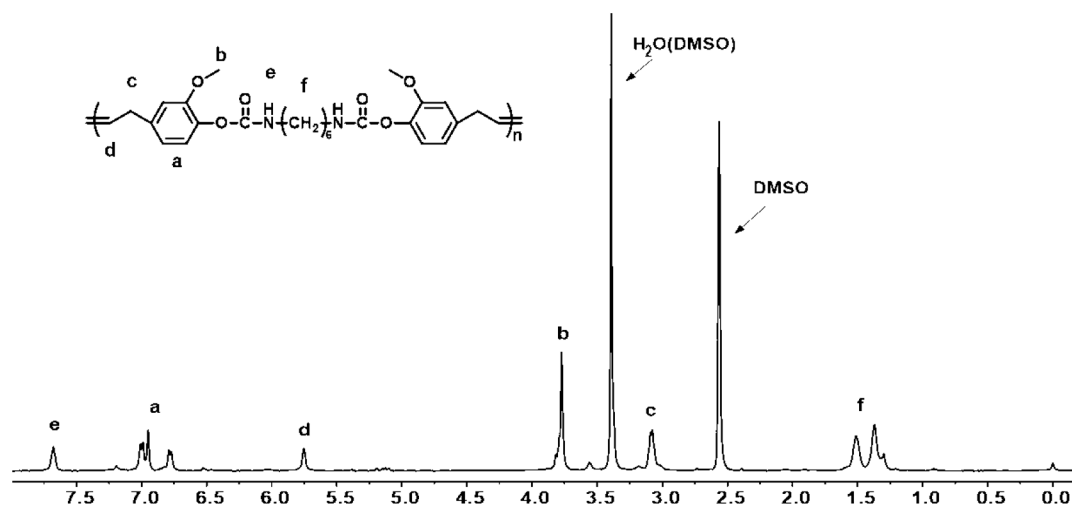

Figure S11. The <sup>1</sup>H NMR spectrum of P(Eug-HDI).

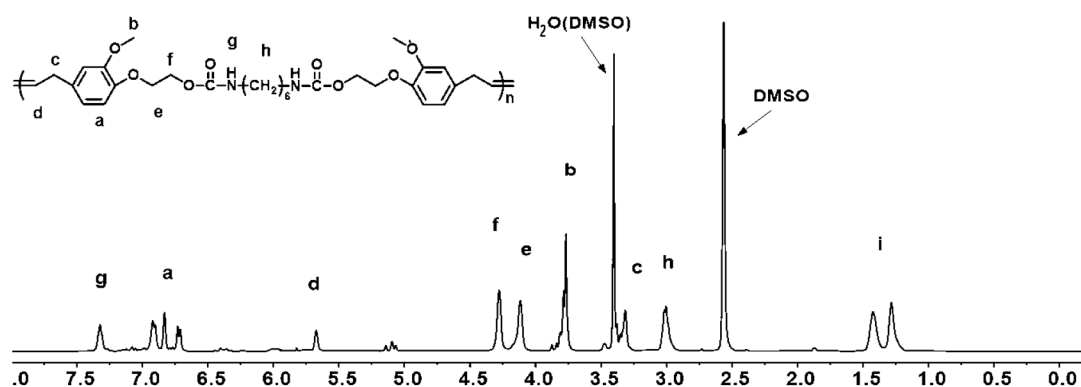

Figure S12. The <sup>1</sup>H NMR spectrum of P(Syol-HDI).

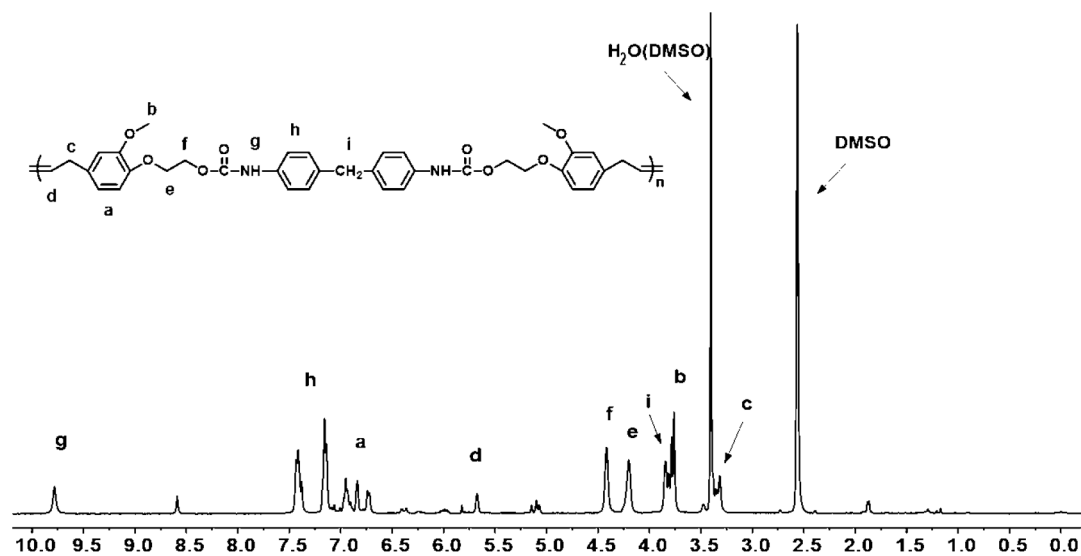

Figure S13. The <sup>1</sup>H NMR spectrum of P(Syol-MDI).

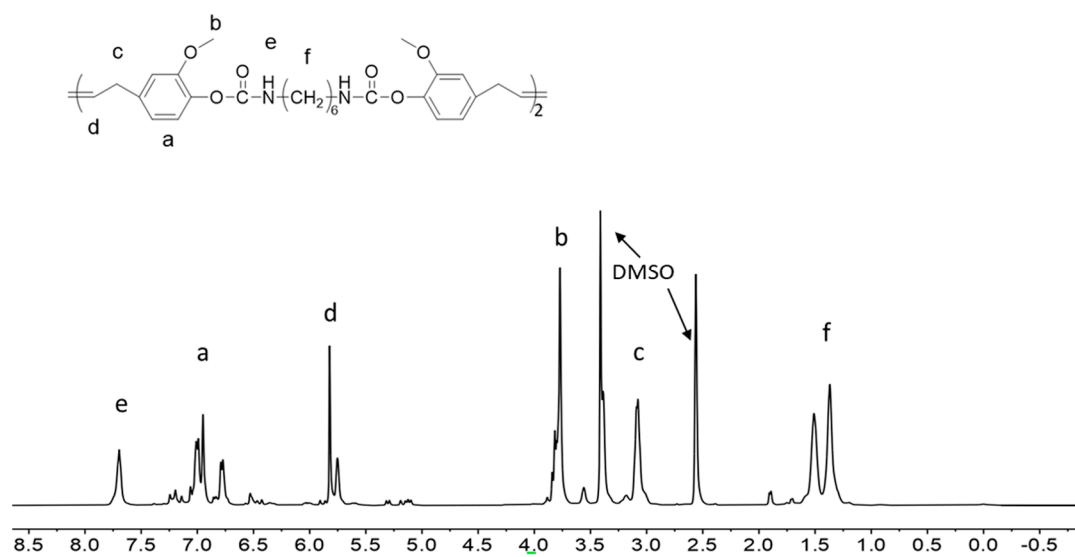

**Figure S14.** The  $^1\text{H}$  NMR spectrum of product in methanol filtrate by dried by rotary evaporation.

**Table S1.** Olefin metathesis polymerization of Eug-HDI under different solvents, temperatures and reaction times.

| En-try | Eug-HDI/Cat.<br>(molar ratio) | Solvent<br>(8ml) | T<br>(°C) | t<br>(h) | Conv.<br>(%) | $M_n$<br>(g/mol) | $\bar{D}$ | $n$ |
|--------|-------------------------------|------------------|-----------|----------|--------------|------------------|-----------|-----|
| 1      | 100/1                         | THF              | 40        | 6        | 1.0          | 3000             | 1.40      | 6   |
| 2      | 100/1                         | THF              | 50        | 6        | 21.6         | 3100             | 1.36      | 6   |
| 3      | 100/1                         | THF              | 60        | 6        | 39.5         | 3300             | 1.33      | 7   |
| 4      | 100/1                         | THF              | 65        | 6        | 35.9         | 3400             | 1.44      | 7   |
| 5      | 100/1                         | TOL              | 40        | 6        | 10.0         | 2000             | 1.25      | 4   |
| 6      | 100/1                         | TOL              | 50        | 6        | 39.8         | 2000             | 1.28      | 4   |
| 7      | 100/1                         | TOL              | 60        | 6        | 63.5         | 2300             | 1.31      | 5   |
| 8      | 100/1                         | TOL              | 80        | 6        | 60.3         | 2600             | 1.53      | 6   |
| 9      | 100/1                         | TOL              | 100       | 6        | 57.6         | 2900             | 1.31      | 6   |
| 10     | 100/1                         | DCE              | 20        | 6        | 2.2          | 2000             | 1.21      | 4   |
| 11     | 100/1                         | DCE              | 30        | 6        | 29.4         | 2300             | 1.33      | 5   |
| 12     | 100/1                         | DCE              | 40        | 6        | 64.7         | 4400             | 1.41      | 9   |
| 13     | 100/1                         | DCE              | 50        | 6        | 60.5         | 4500             | 1.46      | 9   |
| 14     | 100/1                         | DCE              | 60        | 6        | 53.7         | 4700             | 1.44      | 10  |
| 15     | 100/1                         | DCE              | 80        | 6        | 41.9         | 5200             | 1.63      | 11  |
| 16     | 100/1                         | DCE              | 40        | 1.5      | 35.2         | 2700             | 1.46      | 5   |
| 17     | 100/1                         | DCE              | 40        | 3        | 37.4         | 3000             | 1.38      | 6   |
| 18     | 100/1                         | DCE              | 40        | 6        | 64.7         | 4400             | 1.41      | 9   |
| 19     | 100/1                         | DCE              | 40        | 9        | 64.7         | 3800             | 1.49      | 8   |
| 20     | 100/1                         | DCE              | 40        | 12       | 56.8         | 3500             | 1.52      | 7   |

**Table S2.** Olefin metathesis polymerization of Eug-HDI under different catalyst molar ratios.

| Entry | Eug-HDI/Cat.<br>(molar ratio) | Conv.<br>(%) | Mn<br>(g/mol) | $\bar{D}$ | $n$ |
|-------|-------------------------------|--------------|---------------|-----------|-----|
| 1     | 25/1                          | 14.2         | 6400          | 1.26      | 13  |
| 2     | 50/1                          | 34.3         | 5500          | 1.31      | 11  |
| 3     | 100/1                         | 64.7         | 4400          | 1.41      | 9   |
| 4     | 200/1                         | 44.2         | 2200          | 1.26      | 4   |
| 5     | 400/1                         | 15.2         | 1600          | 1.77      | 3   |
| 6     | 500/1                         | 0.5          | 1600          | 1.02      | 3   |

**Table S3.** Olefin metathesis polymerization of Eug-HDI with different metal salts.

| Entry | Eug-HDI/Cat.<br>(molar ratio) | Addition          | Conv.<br>(%) | Mn <sup>a</sup><br>(g/mol) | $\bar{D}$ <sup>b</sup> | $n$ <sup>c</sup> |
|-------|-------------------------------|-------------------|--------------|----------------------------|------------------------|------------------|
| 1     | 100/1                         | -                 | 64.7         | 4400                       | 1.41                   | 9                |
| 2     | 100/1                         | MgCl <sub>2</sub> | 37.4         | 2200                       | 1.23                   | 4                |
| 3     | 100/1                         | LiI               | 43.1         | 2200                       | 1.27                   | 4                |
| 4     | 100/1                         | NiCl <sub>2</sub> | 78.7         | 3800                       | 1.52                   | 8                |
| 5     | 100/1                         | NiBr <sub>2</sub> | 83.1         | 3000                       | 1.39                   | 6                |
| 6     | 100/1                         | NiI <sub>2</sub>  | 86.6         | 2500                       | 1.33                   | 5                |
| 7     | 100/1                         | CuCl <sub>2</sub> | -            | -                          | -                      | -                |
| 8     | 100/1                         | CuCl              | 11.9         | 2200                       | 1.24                   | 4                |
| 9     | 100/1                         | CuBr              | 22.3         | 2100                       | 1.22                   | 4                |
| 10    | 100/1                         | CuI               | 49.9         | 2200                       | 1.28                   | 4                |
| 11    | 100/1                         | PPNCl             | 25.5         | 2100                       | 1.21                   | 4                |
| 12    | 100/1                         | PBQ               | 55.7         | 3300                       | 1.34                   | 7                |

a. Mn: number-average molecular weight. b. Dispersion index, used to describe the molecular weight distribution of polymer. c. n: degree of polymerization.
